# Supplementary material for: Evaluating the consistency of the TRMM over the rain gauge for drought monitoring in the semi-arid region of Karnataka, India, using statistical methods
Source: Royal Society of Chemistry journal article supplement (doi:10.1039/d2va00113f), 2022-01-01
Supplement: d2va00113f1.pdf [file d2va00113f1.pdf]

### Deciles Index

| Station    | Statistics | Jan   | Feb   | Mar   | Apr   | May   | Jun   | Jul  | Aug   | Sep  | Oct  | Nov   | Dec   |
|------------|------------|-------|-------|-------|-------|-------|-------|------|-------|------|------|-------|-------|
| C N Halli  | r          | 0.67  | 0.59  | 0.82  | 0.71  | 0.60  | 0.19  | 0.22 | 0.67  | 0.77 | 0.69 | 0.70  | 0.59  |
|            | t-test     | -2.06 | -1.09 | -2.00 | 0.10  | 0.00  | 0.06  | 0.00 | 0.00  | 0.11 | 0.00 | 0.00  | -2.14 |
|            | RMSE       | 3.21  | 3.34  | 2.28  | 2.14  | 2.54  | 3.65  | 3.54 | 2.32  | 1.94 | 2.24 | 2.22  | 3.55  |
| Gubbi      | r          | 0.54  | 0.61  | 0.88  | 0.54  | 0.66  | 0.36  | 0.48 | 0.63  | 0.69 | 0.68 | 0.71  | 0.36  |
|            | t-test     | -2.48 | -0.86 | -1.98 | 0.08  | 0.00  | 0.06  | 0.07 | 0.00  | 0.00 | 0.09 | 0.10  | 0.62  |
|            | RMSE       | 3.83  | 3.20  | 1.83  | 2.72  | 2.35  | 3.25  | 2.92 | 2.43  | 2.24 | 2.25 | 2.16  | 4.08  |
| Koratagere | r          | 0.29  | 0.79  | 0.74  | 0.71  | 0.44  | 0.71  | 0.68 | 0.70  | 0.63 | 0.74 | 0.77  | 0.20  |
|            | t-test     | -2.19 | -2.39 | -1.57 | 0.00  | 0.00  | 0.00  | 0.09 | -0.10 | 0.00 | 0.00 | 0.00  | -0.05 |
|            | RMSE       | 4.53  | 2.56  | 2.52  | 2.17  | 3.02  | 2.15  | 2.27 | 2.18  | 2.43 | 2.04 | 1.93  | 4.06  |
| Kunigal    | r          | 0.19  | 0.64  | 0.71  | 0.47  | 0.60  | 0.23  | 0.54 | 0.45  | 0.84 | 0.90 | 0.58  | 0.18  |
|            | t-test     | -1.18 | -0.71 | -0.37 | 0.00  | -0.16 | 0.00  | 0.00 | 0.07  | 0.13 | 0.00 | 0.00  | 0.50  |
|            | RMSE       | 4.75  | 2.98  | 2.28  | 2.92  | 2.56  | 3.52  | 2.76 | 2.99  | 1.64 | 1.28 | 2.61  | 4.22  |
| Madhugiri  | r          | 0.61  | 0.84  | 0.78  | 0.59  | 0.25  | 0.72  | 0.43 | 0.61  | 0.85 | 0.76 | 0.63  | 0.23  |
|            | t-test     | -3.69 | -2.20 | -2.35 | 0.00  | 0.00  | 0.00  | 0.07 | 0.00  | 0.13 | 0.11 | -0.08 | -0.30 |
|            | RMSE       | 3.77  | 2.21  | 2.59  | 2.56  | 3.48  | 2.11  | 3.04 | 2.52  | 1.58 | 1.97 | 2.46  | 4.17  |
| Pavagada   | r          | 0.61  | 0.84  | 0.78  | 0.59  | 0.25  | 0.72  | 0.43 | 0.61  | 0.85 | 0.76 | 0.63  | 0.23  |
|            | t-test     | -1.70 | -2.03 | -1.98 | -0.11 | 0.00  | 0.00  | 0.00 | 0.08  | 0.00 | 0.00 | 0.00  | -0.59 |
|            | RMSE       | 3.01  | 3.25  | 2.98  | 1.97  | 2.97  | 2.02  | 2.24 | 2.60  | 2.86 | 2.84 | 2.20  | 2.83  |
| Sira       | r          | 0.40  | 0.66  | 0.80  | 0.81  | 0.38  | 0.45  | 0.46 | 0.58  | 0.76 | 0.58 | 0.79  | 0.33  |
|            | t-test     | -1.43 | -0.28 | -0.95 | -0.12 | -0.13 | -0.07 | 0.07 | -0.16 | 0.00 | 0.08 | 0.00  | -1.10 |
|            | RMSE       | 4.12  | 2.95  | 2.24  | 1.75  | 3.13  | 2.98  | 2.98 | 2.63  | 1.95 | 2.57 | 1.83  | 4.11  |
| Tiptur     | r          | 0.40  | 0.69  | 0.65  | 0.62  | 0.44  | 0.25  | 0.41 | 0.57  | 0.78 | 0.69 | 0.62  | 0.43  |
|            | t-test     | -2.38 | -0.77 | -0.41 | 0.00  | 0.07  | -0.06 | 0.00 | 0.00  | 0.11 | 0.09 | 0.00  | 0.30  |
|            | RMSE       | 4.24  | 2.73  | 2.55  | 2.49  | 2.98  | 3.50  | 3.10 | 2.65  | 1.92 | 2.23 | 2.47  | 3.50  |
| Tumakuru   | r          | 0.37  | 0.59  | 0.74  | 0.45  | 0.57  | 0.62  | 0.66 | 0.48  | 0.91 | 0.72 | 0.69  | -0.09 |
|            | t-test     | -1.30 | -0.84 | -0.65 | 0.07  | 0.00  | -0.08 | 0.00 | 0.07  | 0.18 | 0.10 | 0.00  | 0.79  |
|            | RMSE       | 4.16  | 3.30  | 2.27  | 2.98  | 2.65  | 2.50  | 2.34 | 2.92  | 1.19 | 2.10 | 2.26  | 4.81  |
| Tumakuru-1 | r          | 0.38  | 0.48  | 0.68  | 0.46  | 0.32  | 0.41  | 0.29 | 0.47  | 0.55 | 0.58 | 0.60  | 0.10  |
|            | t-test     | -1.97 | -1.75 | -2.01 | -0.07 | 0.06  | -0.07 | 0.06 | 0.07  | 0.00 | 0.08 | 0.00  | 0.78  |
|            | RMSE       | 4.26  | 3.83  | 2.94  | 2.98  | 3.30  | 3.08  | 3.39 | 2.93  | 2.68 | 2.57 | 2.54  | 4.88  |
| Turuvekere | r          | 0.54  | 0.75  | 0.61  | 0.28  | 0.52  | 0.30  | 0.60 | 0.34  | 0.65 | 0.65 | 0.76  | 0.47  |
|            | t-test     | -1.55 | -0.50 | -0.74 | 0.12  | 0.00  | 0.00  | 0.16 | 0.06  | 0.09 | 0.09 | 0.00  | 0.25  |
|            | RMSE       | 3.68  | 2.52  | 2.84  | 3.40  | 2.80  | 3.36  | 2.58 | 3.25  | 2.38 | 2.35 | 1.98  | 3.28  |

## MCZI

| Station    | Statistics | Jan   | Feb   | Mar   | Apr   | May   | Jun   | Jul   | Aug   | Sep   | Oct   | Nov   | Dec   |
|------------|------------|-------|-------|-------|-------|-------|-------|-------|-------|-------|-------|-------|-------|
| C N Halli  | r          | 0.21  | 0.31  | 0.86  | 0.68  | 0.65  | 0.23  | 0.35  | 0.70  | 0.77  | 0.73  | 0.82  | 0.90  |
|            | t-test     | -0.15 | -0.44 | 2.12  | -0.29 | 0.47  | -1.51 | -0.11 | -1.39 | 0.83  | 1.79  | 0.85  | 1.47  |
|            | RMSE       | 0.573 | 0.59  | 0.285 | 0.648 | 0.841 | 1.249 | 0.929 | 0.719 | 0.675 | 0.7   | 0.335 | 0.234 |
| Gubbi      | r          | 0.04  | 0.33  | 0.82  | 0.47  | 0.59  | 0.36  | 0.54  | 0.62  | 0.65  | 0.69  | 0.80  | 0.70  |
|            | t-test     | -0.34 | -0.31 | 0.11  | 0.52  | 3.06  | -1.87 | -1.13 | 0.77  | 2.07  | -0.17 | 1.93  | 0.26  |
|            | RMSE       | 0.628 | 0.527 | 0.306 | 0.901 | 0.987 | 1.133 | 0.801 | 0.807 | 0.871 | 0.754 | 0.353 | 0.377 |
| Koratagere | r          | 0.50  | 0.66  | 0.76  | 0.72  | 0.58  | 0.72  | 0.71  | 0.74  | 0.72  | 0.78  | 0.86  | 0.60  |
|            | t-test     | 1.15  | 0.36  | 0.02  | 0.75  | 2.50  | 0.28  | -0.70 | -1.28 | -1.44 | 0.22  | 2.56  | -0.21 |
|            | RMSE       | 0.442 | 0.417 | 0.377 | 0.603 | 0.974 | 0.663 | 0.527 | 0.74  | 0.765 | 0.641 | 0.405 | 0.385 |
| Kunigal    | r          | 0.33  | 0.26  | 0.75  | 0.50  | 0.56  | 0.26  | 0.67  | 0.42  | 0.83  | 0.91  | 0.64  | 0.50  |
|            | t-test     | 1.15  | 0.25  | -0.76 | 1.86  | 0.19  | -0.59 | 1.30  | 1.78  | 3.29  | 1.15  | 0.43  | -1.95 |
|            | RMSE       | 0.523 | 0.599 | 0.417 | 0.894 | 0.932 | 1.168 | 0.672 | 1.036 | 0.684 | 0.42  | 0.632 | 0.641 |
| Madhugiri  | r          | 0.55  | 0.43  | 0.58  | 0.70  | 0.33  | 0.59  | 0.65  | 0.62  | 0.87  | 0.78  | 0.84  | 0.53  |
|            | t-test     | 1.21  | -0.08 | 0.47  | 1.63  | 1.01  | -0.60 | 0.38  | 1.85  | -0.29 | 1.72  | 1.49  | -0.29 |
|            | RMSE       | 0.478 | 0.521 | 0.457 | 0.593 | 1.164 | 0.923 | 0.584 | 0.828 | 0.5   | 0.666 | 0.358 | 0.461 |
| Pavagada   | r          | 0.85  | 0.29  | 0.84  | 0.69  | 0.47  | 0.67  | 0.71  | 0.57  | 0.50  | 0.53  | 0.60  | 0.52  |
|            | t-test     | 0.49  | -0.14 | -0.57 | 0.32  | 1.34  | -1.10 | 1.34  | 2.78  | 4.22  | 0.48  | -0.14 | -3.16 |
|            | RMSE       | 0.279 | 0.498 | 0.293 | 0.572 | 1.078 | 0.764 | 0.557 | 0.995 | 1.156 | 0.926 | 0.523 | 0.951 |
| Sira       | r          | 0.44  | 0.69  | 0.79  | 0.77  | 0.26  | 0.41  | 0.53  | 0.44  | 0.79  | 0.70  | 0.75  | 0.79  |
|            | t-test     | 0.09  | -0.24 | 1.06  | 1.75  | 0.28  | -0.86 | 0.92  | 0.42  | -0.39 | 0.32  | -1.13 | 1.04  |
|            | RMSE       | 0.481 | 0.397 | 0.32  | 0.619 | 1.212 | 1.037 | 0.791 | 0.926 | 0.636 | 0.686 | 0.423 | 0.322 |
| Tiptur     | r          | 0.18  | 0.34  | 0.80  | 0.58  | 0.42  | 0.28  | 0.46  | 0.52  | 0.75  | 0.78  | 0.66  | 0.66  |
|            | t-test     | -0.77 | -0.14 | -0.59 | 1.01  | 0.34  | -0.27 | 2.64  | -2.71 | -0.20 | -1.91 | -0.58 | 0.03  |
|            | RMSE       | 0.557 | 0.565 | 0.34  | 0.91  | 1.08  | 1.112 | 0.997 | 1.019 | 0.705 | 0.693 | 0.524 | 0.424 |
| Tumakuru   | r          | 0.22  | 0.28  | 0.84  | 0.45  | 0.47  | 0.53  | 0.59  | 0.44  | 0.91  | 0.78  | 0.69  | 0.25  |
|            | t-test     | 0.23  | 0.64  | -0.46 | -1.10 | -0.17 | -0.51 | -0.90 | -0.04 | 3.24  | 1.57  | 0.89  | 0.11  |
|            | RMSE       | 0.612 | 0.568 | 0.297 | 0.927 | 1.032 | 0.947 | 0.792 | 1.015 | 0.513 | 0.65  | 0.539 | 0.533 |
| Tumakuru-1 | r          | 0.10  | 0.15  | 0.52  | 0.52  | 0.26  | 0.37  | 0.14  | 0.51  | 0.58  | 0.62  | 0.62  | 0.42  |
|            | t-test     | 0.87  | 0.62  | 0.58  | 1.37  | 0.66  | -1.22 | -0.10 | -0.04 | 1.65  | 0.39  | -0.31 | 0.10  |
|            | RMSE       | 0.612 | 0.546 | 0.48  | 0.817 | 1.21  | 1.069 | 0.934 | 0.874 | 0.918 | 0.851 | 0.525 | 0.502 |
| Turuvekere | r          | 0.47  | 0.69  | 0.82  | 0.34  | 0.50  | 0.47  | 0.40  | 0.22  | 0.70  | 0.68  | 0.59  | 0.80  |
|            | t-test     | 0.59  | -0.03 | 0.42  | -0.82 | 1.15  | 1.27  | 3.00  | 0.21  | 1.48  | 1.16  | -0.79 | 0.46  |
|            | RMSE       | 0.475 | 0.366 | 0.281 | 0.921 | 1.002 | 0.758 | 0.999 | 1.226 | 0.778 | 0.793 | 0.549 | 0.289 |

PN

| Station           | Statistics | Jan    | Feb    | Mar    | Apr    | May   | Jun   | Jul    | Aug   | Sep   | Oct   | Nov    | Dec    |
|-------------------|------------|--------|--------|--------|--------|-------|-------|--------|-------|-------|-------|--------|--------|
| <b>C N Halli</b>  | r          | 0.09   | 0.20   | 0.91   | 0.64   | 0.64  | 0.15  | 0.48   | 0.65  | 0.72  | 0.68  | 0.85   | 0.87   |
|                   | t-test     | 0.00   | 0.00   | 0.00   | 0.00   | 0.00  | 0.00  | 0.00   | 0.00  | 0.00  | 0.00  | 0.00   | 0.00   |
|                   | RMSE       | 327.24 | 234.12 | 88.61  | 68.43  | 47.34 | 83.46 | 74.66  | 56.92 | 46.59 | 48.52 | 76.24  | 117.80 |
| <b>Gubbi</b>      | r          | -0.03  | 0.29   | 0.80   | 0.48   | 0.65  | 0.29  | 0.54   | 0.55  | 0.63  | 0.68  | 0.82   | 0.79   |
|                   | t-test     | 0.00   | 0.00   | 0.00   | 0.00   | 0.00  | 0.00  | 0.00   | 0.00  | 0.00  | 0.00  | 0.00   | 0.00   |
|                   | RMSE       | 359.74 | 266.51 | 109.22 | 83.19  | 49.20 | 80.04 | 73.14  | 65.65 | 53.58 | 48.15 | 79.18  | 143.83 |
| <b>Koratagere</b> | r          | 0.34   | 0.60   | 0.67   | 0.73   | 0.48  | 0.64  | 0.64   | 0.69  | 0.74  | 0.76  | 0.94   | 0.84   |
|                   | t-test     | 0.00   | 0.00   | 0.00   | 0.00   | 0.00  | 0.00  | 0.00   | 0.00  | 0.00  | 0.00  | 0.00   | 0.00   |
|                   | RMSE       | 329.13 | 154.17 | 127.58 | 63.37  | 64.80 | 57.80 | 71.96  | 42.50 | 37.44 | 42.99 | 50.23  | 113.28 |
| <b>Kunigal</b>    | r          | 0.20   | 0.15   | 0.77   | 0.46   | 0.56  | 0.20  | 0.70   | 0.36  | 0.80  | 0.94  | 0.64   | 0.67   |
|                   | t-test     | 0.00   | 0.00   | 0.00   | 0.00   | 0.00  | 0.00  | 0.00   | 0.00  | 0.00  | 0.00  | 0.00   | 0.00   |
|                   | RMSE       | 317.39 | 250.12 | 111.94 | 79.29  | 48.49 | 78.77 | 56.06  | 63.90 | 38.16 | 18.93 | 84.29  | 155.36 |
| <b>Madhugiri</b>  | r          | 0.47   | 0.47   | 0.40   | 0.72   | 0.26  | 0.75  | 0.62   | 0.59  | 0.87  | 0.77  | 0.93   | 0.57   |
|                   | t-test     | 0.00   | 0.00   | 0.00   | 0.00   | 0.00  | 0.00  | 0.00   | 0.00  | 0.00  | 0.00  | 0.00   | 0.00   |
|                   | RMSE       | 262.09 | 209.35 | 198.64 | 93.46  | 65.45 | 47.45 | 70.67  | 72.15 | 29.18 | 45.88 | 50.09  | 175.48 |
| <b>Pavagada</b>   | r          | 0.88   | 0.15   | 0.81   | 0.63   | 0.45  | 0.52  | 0.73   | 0.55  | 0.45  | 0.65  | 0.57   | 0.47   |
|                   | t-test     | 0.00   | 0.00   | 0.00   | 0.00   | 0.00  | 0.00  | 0.00   | 0.00  | 0.00  | 0.00  | 0.00   | 0.00   |
|                   | RMSE       | 89.49  | 311.53 | 110.60 | 86.35  | 52.95 | 67.29 | 51.71  | 51.83 | 78.65 | 59.09 | 133.67 | 151.87 |
| <b>Sira</b>       | r          | 0.88   | 0.15   | 0.81   | 0.63   | 0.45  | 0.52  | 0.73   | 0.55  | 0.45  | 0.65  | 0.57   | 0.47   |
|                   | t-test     | 0.00   | 0.00   | 0.00   | 0.00   | 0.00  | 0.00  | 0.00   | 0.00  | 0.00  | 0.00  | 0.00   | 0.00   |
|                   | RMSE       | 265.62 | 130.43 | 103.85 | 61.14  | 71.26 | 64.76 | 70.69  | 97.27 | 38.45 | 47.77 | 111.76 | 132.10 |
| <b>Tiptur</b>     | r          | 0.09   | 0.26   | 0.82   | 0.60   | 0.41  | 0.20  | 0.42   | 0.49  | 0.75  | 0.74  | 0.68   | 0.58   |
|                   | t-test     | 0.00   | 0.00   | 0.00   | 0.00   | 0.00  | 0.00  | 0.00   | 0.00  | 0.00  | 0.00  | 0.00   | 0.00   |
|                   | RMSE       | 351.97 | 215.34 | 101.36 | 54.19  | 58.85 | 80.52 | 84.23  | 67.91 | 38.33 | 42.11 | 88.84  | 182.36 |
| <b>Tumakuru</b>   | r          | 0.12   | 0.13   | 0.80   | 0.43   | 0.47  | 0.47  | 0.53   | 0.46  | 0.91  | 0.81  | 0.68   | 0.19   |
|                   | t-test     | 0.00   | 0.00   | 0.00   | 0.00   | 0.00  | 0.00  | 0.00   | 0.00  | 0.00  | 0.00  | 0.00   | 0.00   |
|                   | RMSE       | 292.62 | 251.50 | 106.67 | 77.44  | 54.94 | 58.42 | 63.60  | 62.16 | 24.48 | 33.80 | 83.73  | 277.91 |
| <b>Tumakuru-1</b> | r          | 0.00   | 0.02   | 0.37   | 0.46   | 0.28  | 0.40  | 0.16   | 0.38  | 0.59  | 0.64  | 0.66   | 0.38   |
|                   | t-test     | 0.00   | 0.00   | 0.00   | 0.00   | 0.00  | 0.00  | 0.00   | 0.00  | 0.00  | 0.00  | 0.00   | 0.00   |
|                   | RMSE       | 356.53 | 334.08 | 203.14 | 109.72 | 64.07 | 73.31 | 100.15 | 83.30 | 59.82 | 50.24 | 99.83  | 226.91 |
| <b>Turuvekere</b> | r          | 0.35   | 0.61   | 0.91   | 0.28   | 0.53  | 0.44  | 0.22   | 0.10  | 0.68  | 0.64  | 0.59   | 0.88   |
|                   | t-test     | 0.00   | 0.00   | 0.00   | 0.00   | 0.00  | 0.00  | 0.00   | 0.00  | 0.00  | 0.00  | 0.00   | 0.00   |
|                   | RMSE       | 238.80 | 169.10 | 79.59  | 98.87  | 58.48 | 91.58 | 127.74 | 95.54 | 42.53 | 48.69 | 101.33 | 95.93  |

## RAI

| Station    | Statistics | Jan   | Feb   | Mar   | Apr   | May   | Jun   | Jul   | Aug   | Sep   | Oct   | Nov   | Dec  |
|------------|------------|-------|-------|-------|-------|-------|-------|-------|-------|-------|-------|-------|------|
| C N Halli  | r          | 0.12  | 0.22  | 0.91  | 0.65  | 0.64  | 0.15  | 0.48  | 0.66  | 0.73  | 0.69  | 0.85  | 0.87 |
|            | t-test     | -0.02 | -0.01 | -0.19 | 0.02  | -0.04 | 0.12  | -0.02 | 0.11  | -0.05 | -0.13 | -0.12 | 0.05 |
|            | RMSE       | 8.27  | 5.98  | 2.26  | 2.88  | 2.79  | 4.49  | 3.73  | 2.65  | 2.52  | 2.58  | 2.72  | 2.98 |
| Gubbi      | r          | -0.02 | 0.29  | 0.81  | 0.48  | 0.65  | 0.29  | 0.55  | 0.56  | 0.63  | 0.68  | 0.82  | 0.78 |
|            | t-test     | -0.02 | -0.05 | -0.12 | -0.03 | -0.21 | 0.13  | 0.03  | -0.06 | -0.17 | 0.01  | -0.06 | 0.15 |
|            | RMSE       | 9.17  | 6.85  | 2.92  | 3.66  | 2.94  | 4.39  | 3.44  | 3.04  | 2.89  | 2.65  | 2.95  | 3.81 |
| Koratagere | r          | 0.36  | 0.62  | 0.69  | 0.73  | 0.49  | 0.65  | 0.65  | 0.69  | 0.74  | 0.76  | 0.93  | 0.82 |
|            | t-test     | -0.06 | 0.00  | -0.09 | -0.05 | -0.17 | -0.03 | 0.04  | 0.11  | 0.13  | -0.01 | -0.16 | 0.08 |
|            | RMSE       | 8.30  | 3.95  | 3.43  | 2.68  | 3.59  | 3.09  | 3.33  | 2.58  | 2.45  | 2.42  | 1.93  | 3.25 |
| Kunigal    | r          | 0.21  | 0.17  | 0.77  | 0.47  | 0.56  | 0.21  | 0.70  | 0.37  | 0.80  | 0.94  | 0.64  | 0.65 |
|            | t-test     | -0.02 | -0.02 | 0.03  | -0.13 | -0.02 | 0.04  | -0.10 | -0.14 | -0.22 | -0.11 | -0.03 | 0.24 |
|            | RMSE       | 8.03  | 6.46  | 3.06  | 3.57  | 3.13  | 4.30  | 2.84  | 3.93  | 2.12  | 1.19  | 3.30  | 4.09 |
| Madhugiri  | r          | 0.48  | 0.48  | 0.43  | 0.72  | 0.26  | 0.75  | 0.63  | 0.60  | 0.87  | 0.77  | 0.93  | 0.57 |
|            | t-test     | -0.09 | -0.01 | -0.09 | -0.19 | -0.08 | -0.03 | -0.05 | -0.04 | 0.03  | -0.13 | -0.15 | 0.00 |
|            | RMSE       | 6.64  | 5.40  | 5.25  | 2.94  | 4.44  | 2.71  | 3.46  | 3.57  | 1.72  | 2.24  | 1.93  | 4.63 |
| Pavagada   | r          | 0.87  | 0.16  | 0.82  | 0.64  | 0.45  | 0.52  | 0.73  | 0.55  | 0.46  | 0.65  | 0.58  | 0.48 |
|            | t-test     | 0.00  | -0.06 | -0.10 | -0.01 | -0.12 | -0.04 | -0.12 | -0.22 | -0.24 | 0.00  | 0.02  | 0.19 |
|            | RMSE       | 2.37  | 8.05  | 2.90  | 2.95  | 3.80  | 3.94  | 2.75  | 3.17  | 3.86  | 3.09  | 4.12  | 4.58 |
| Sira       | r          | 0.33  | 0.72  | 0.84  | 0.77  | 0.22  | 0.52  | 0.58  | 0.29  | 0.76  | 0.72  | 0.67  | 0.81 |
|            | t-test     | -0.02 | -0.01 | 0.01  | -0.15 | -0.02 | 0.04  | -0.08 | -0.02 | 0.04  | -0.02 | 0.01  | 0.07 |
|            | RMSE       | 6.72  | 3.43  | 2.80  | 2.31  | 4.13  | 3.72  | 3.51  | 4.29  | 2.25  | 2.59  | 3.55  | 3.40 |
| Tiptur     | r          | 0.10  | 0.27  | 0.82  | 0.60  | 0.41  | 0.21  | 0.43  | 0.49  | 0.75  | 0.75  | 0.68  | 0.59 |
|            | t-test     | -0.02 | 0.01  | 0.04  | -0.10 | -0.03 | 0.02  | -0.13 | 0.19  | 0.02  | 0.14  | 0.00  | 0.05 |
|            | RMSE       | 8.96  | 5.57  | 2.79  | 3.07  | 3.76  | 4.16  | 4.19  | 3.42  | 2.31  | 2.38  | 3.44  | 4.76 |
| Tumakuru   | r          | 0.14  | 0.15  | 0.81  | 0.44  | 0.47  | 0.48  | 0.54  | 0.46  | 0.91  | 0.81  | 0.68  | 0.19 |
|            | t-test     | -0.03 | -0.03 | -0.05 | 0.07  | 0.01  | 0.03  | 0.06  | -0.01 | -0.27 | -0.14 | -0.08 | 0.04 |
|            | RMSE       | 7.43  | 6.45  | 2.83  | 3.61  | 3.67  | 3.54  | 3.46  | 3.59  | 1.40  | 2.05  | 3.28  | 7.48 |
| Tumakuru-1 | r          | 0.01  | 0.03  | 0.40  | 0.46  | 0.28  | 0.40  | 0.16  | 0.39  | 0.59  | 0.63  | 0.66  | 0.38 |
|            | t-test     | -0.03 | -0.02 | -0.06 | -0.09 | -0.06 | 0.08  | -0.02 | 0.00  | -0.13 | -0.04 | -0.01 | 0.07 |
|            | RMSE       | 9.11  | 8.50  | 5.32  | 3.81  | 4.04  | 3.98  | 5.10  | 3.91  | 2.95  | 2.80  | 3.81  | 5.88 |
| Turuvekere | r          | 0.37  | 0.62  | 0.91  | 0.29  | 0.52  | 0.45  | 0.23  | 0.10  | 0.69  | 0.64  | 0.59  | 0.87 |
|            | t-test     | -0.01 | -0.03 | 0.11  | 0.05  | -0.10 | 0.01  | -0.12 | -0.02 | -0.12 | -0.09 | -0.04 | 0.17 |
|            | RMSE       | 6.08  | 4.34  | 2.25  | 4.07  | 3.28  | 4.52  | 5.59  | 4.94  | 2.58  | 2.92  | 4.21  | 2.72 |
